# Supplementary material for: Role of long non‐coding RNAs in adipogenesis: State of the art and implications in obesity and obesity‐associated diseases
Source: PubMed Central journal article supplement (PMC8244036; doi:10.1111/obr.13203), 2021-01-14
Supplement: OBR-22-e13203-s001.pdf [file OBR-22-e13203-s001.pdf]

# **Role of long non-coding RNAs in adipogenesis: state of the art and implications in obesity and obesity-associated diseases**

Federica Rey<sup>1,2</sup>, Valentina Urrata<sup>1,2</sup>, Luisa Gilardini<sup>3</sup>, Simona Bertoli<sup>3,4</sup>, Valeria Calcaterra<sup>5,6</sup>, Gian Vincenzo Zuccotti<sup>1,2,6</sup>, Raffaella Canello<sup>3</sup>, Stephana Carelli<sup>1,2</sup>

<sup>1</sup> Department of Biomedical and Clinical Sciences "L. Sacco", University of Milan, Via Grassi 74, 20157 Milan, Italy

<sup>2</sup> Pediatric Clinical Research Center Fondazione "Romeo ed Enrica Invernizzi", University of Milano, Milano, Italy

<sup>3</sup> Obesity Unit—Laboratory of Nutrition and Obesity Research, Department of Endocrine and Metabolic Diseases, IRCCS Istituto Auxologico Italiano, Milan, Italy

<sup>4</sup> International Center for the Assessment of Nutritional Status (ICANS), Department of Food, Environmental and Nutritional Sciences (DeFENS), University of Milan, Milan, Italy

<sup>5</sup> Pediatrics and Adolescentology Unit, Department of Internal Medicine, University of Pavia, Pavia, Italy

<sup>6</sup> Department of Pediatrics, Children's Hospital "V. Buzzi", Milano, Italy

**Correspondence:** Dr. Stephana Carelli, Pediatric Research Center "Romeo ed Enrica Invernizzi", Dept. Biomedical and Clinical Sciences, University of Milano, Via G.B. Grassi 74, 20157, Milano, Italy. E-mail: [stephana.carelli@unimi.it](mailto:stephana.carelli@unimi.it). Tel. 00390250319825

Table S1: List of lncRNAs cited in the manuscript listed in alphabetical order with the number of known orthologues and a specific focus on their presence in the most common models (*Rattus Norvegicus*, *Mus Musculus* and *Homo Sapiens*)

|                                        | # of orthologues          | <i>Rattus Norvegicus</i> | <i>Mus musculus</i> | <i>Homo Sapiens</i> |
|----------------------------------------|---------------------------|--------------------------|---------------------|---------------------|
| 1700020I14Rik                          | 5                         | Yes                      | Yes                 | Yes                 |
| AC092834.1                             | N/A                       | No                       | No                  | Yes                 |
| ADINR (CEBPA-DT)                       | N/A                       | No                       | No                  | Yes                 |
| AdipoQ AS                              | N/A                       | No                       | Yes                 | No                  |
| ADNCR                                  | N/A ( <i>Bos Taurus</i> ) | No                       | No                  | No                  |
| AF131217.1                             | N/A                       | No                       | No                  | Yes                 |
| Ahit                                   | N/A                       | No                       | Yes                 | No                  |
| AK012226 ( <i>Lrmda</i> )              | 332                       | Yes                      | Yes                 | Yes                 |
| AK055347                               | N/A                       | No                       | No                  | Yes                 |
| AK079912                               | N/A                       | No                       | Yes                 | No                  |
| AK080084                               | N/A                       | No                       | Yes                 | No                  |
| AK088388 ( <i>N4bp2</i> )              | 330                       | Yes                      | Yes                 | Yes                 |
| AK098656 ( <i>LINC01227</i> )          | N/A                       | No                       | No                  | Yes                 |
| AK125261 ( <i>CDHR3</i> )              | 256                       | Yes                      | Yes                 | Yes                 |
| AP001053.11                            | N/A                       | No                       | No                  | Yes                 |
| APF                                    | N/A                       | No                       | Yes                 | No                  |
| ASMER-1                                | N/A                       | No                       | No                  | Yes                 |
| ASMER-2                                | N/A                       | No                       | No                  | Yes                 |
| ASncmtRNA-2                            | N/A                       | No                       | Yes                 | Yes                 |
| Blnc1 ( <i>PAQR9</i> )                 | 326                       | Yes                      | Yes                 | Yes                 |
| CAIF                                   | N/A                       | No                       | No                  | Yes                 |
| CARL                                   | N/A                       | No                       | Yes                 | No                  |
| CASC2                                  | N/A                       | No                       | No                  | Yes                 |
| CDKN2BAS1/ <i>ANRIL</i>                | N/A                       | No                       | No                  | Yes                 |
| Cebpd                                  | N/A                       | No                       | Yes                 | No                  |
| Chaer                                  | N/A                       | No                       | No                  | Yes                 |
| CHRF                                   | N/A                       | No                       | Yes                 | No                  |
| CILinc01                               | N/A                       | No                       | No                  | Yes                 |
| CILinc02                               | N/A                       | No                       | No                  | Yes                 |
| CJ241444                               | N/A                       | No                       | Yes                 | No                  |
| CoroMarker                             | N/A                       | No                       | No                  | Yes                 |
| CTA-384D8.35                           | N/A                       | No                       | No                  | Yes                 |
| CTB-114C7.4                            | N/A                       | No                       | No                  | Yes                 |
| CYP4B1-PS1-001                         | N/A                       | No                       | Yes                 | No                  |
| DACH1                                  | 310                       | Yes                      | Yes                 | Yes                 |
| DANCR                                  | 5                         | Yes                      | Yes                 | Yes                 |
| DNAJC27-AS1                            | N/A                       | No                       | No                  | Yes                 |
| E330013P06 ( <i>Carmn</i> )            | 3                         | Yes                      | Yes                 | Yes                 |
| ECRAR                                  | N/A                       | No                       | No                  | Yes                 |
| ENSMUST00000147869                     | N/A                       | No                       | Yes                 | No                  |
| ENST00000550337.1 ( <i>LINC02402</i> ) | N/A                       | No                       | No                  | Yes                 |
| ErbB4-IR                               | N/A                       | No                       | Yes                 | No                  |
| ETF1P2                                 | N/A                       | No                       | No                  | Yes                 |

|                                   |               |     |     |     |
|-----------------------------------|---------------|-----|-----|-----|
| <b>FAF (FANCF)</b>                | 310           | Yes | Yes | Yes |
| <b>FLRL2</b>                      | N/A           | No  | Yes | No  |
| <b>FOXD2-AS1</b>                  | N/A           | No  | No  | Yes |
| <b>GAS5</b>                       | 3             | Yes | Yes | Yes |
| <b>Giver</b>                      | N/A           | No  | No  | Yes |
| <b>Gm15051 (Hotairm1)</b>         | 3             | Yes | Yes | Yes |
| <b>Gm15622</b>                    | N/A           | No  | Yes | No  |
| <b>Gm15645</b>                    | N/A           | No  | Yes | No  |
| <b>Gm4419</b>                     | N/A           | No  | Yes | No  |
| <b>H19</b>                        | 3             | No  | Yes | Yes |
| <b>HAGLR</b>                      | 2             | No  | Yes | Yes |
| <b>HAS2-AS1</b>                   | N/A           | No  | No  | Yes |
| <b>HCG27_201</b>                  | N/A           | No  | No  | Yes |
| <b>HI-LNC45</b>                   | N/A           | No  | No  | Yes |
| <b>HIF1A-AS1</b>                  | N/A           | No  | No  | Yes |
| <b>hLMR</b>                       | N/A           | No  | No  | Yes |
| <b>HOTAIR</b>                     | 4             | No  | Yes | Yes |
| <b>HOXA11-AS1</b>                 | 4             | Yes | Yes | Yes |
| <b>HRCR</b>                       | N/A           | No  | Yes | No  |
| <b>HypERlnc</b>                   | N/A           | No  | No  | Yes |
| <b>IMFNCR</b>                     | N/A (Chicken) | No  | No  | No  |
| <b>KCNQ1OT1</b>                   | N/A           | No  | No  | Yes |
| <b>LET</b>                        | N/A           | No  | No  | Yes |
| <b>LeXis (CT70)</b>               | N/A           | No  | No  | Yes |
| <b>Linc-p21</b>                   | 2             | No  | Yes | Yes |
| <b>LINC00523</b>                  | N/A           | No  | No  | Yes |
| <b>LINC00994</b>                  | N/A           | No  | No  | Yes |
| <b>LINC01021 (PURPL)</b>          | N/A           | No  | No  | Yes |
| <b>LINC01426</b>                  | N/A           | No  | No  | Yes |
| <b>LINC01619</b>                  | 10            | No  | No  | Yes |
| <b>LINC01705</b>                  | N/A           | No  | No  | Yes |
| <b>LINC01915</b>                  | N/A           | No  | No  | Yes |
| <b>lnc-Ang362 (MIR222HG)</b>      | N/A           | No  | No  | Yes |
| <b>lnc-BATE</b>                   | N/A           | No  | Yes | No  |
| <b>lnc-leptin</b>                 | N/A           | No  | Yes | No  |
| <b>lnc-MCG</b>                    | N/A           | No  | Yes | No  |
| <b>lnc-MKI67IP-3 (LINC01826)</b>  | N/A           | No  | No  | Yes |
| <b>lnc-ORA</b>                    | N/A           | No  | Yes | No  |
| <b>lnc19959.2</b>                 | N/A           | Yes | No  | No  |
| <b>lncARSR</b>                    | N/A           | No  | No  | Yes |
| <b>lncPPAR<math>\delta</math></b> | N/A           | No  | No  | Yes |
| <b>lncR-UCA1</b>                  | N/A           | No  | Yes | No  |
| <b>lncRNA-Adi</b>                 | N/A           | Yes | No  | No  |
| <b>LncRNA-p3134</b>               | N/A           | No  | Yes | Yes |
| <b>LY86-AS1</b>                   | N/A           | No  | No  | Yes |
| <b>MALAT1</b>                     | 2             | No  | Yes | Yes |
| <b>MDRL</b>                       | N/A           | No  | Yes | No  |
| <b>MEG3</b>                       | 2             | No  | Yes | Yes |
| <b>MeXis</b>                      | N/A           | No  | Yes | No  |

|                           |     |     |     |     |
|---------------------------|-----|-----|-----|-----|
| MFI2-AS1                  | N/A | No  | No  | Yes |
| MHRT                      | N/A | No  | No  | Yes |
| MIAT                      | 3   | Yes | Yes | Yes |
| MIR31HG                   | 2   | No  | No  | Yes |
| MIR155HG                  | 6   | Yes | Yes | Yes |
| MIR221HG                  | N/A | No  | No  | Yes |
| MIRT1                     | N/A | No  | Yes | No  |
| MIRT2                     | N/A | No  | Yes | No  |
| MRAK048635 P1             | N/A | Yes | No  | No  |
| NEAT1                     | 2   | No  | Yes | Yes |
| NBR2                      | N/A | No  | No  | Yes |
| Nespas (GNAS-AS1)         | N/A | No  | No  | Yes |
| NONHSAT040387             | N/A | No  | No  | Yes |
| NONHSAT098586             | N/A | No  | No  | Yes |
| NONMMUT010685             | N/A | No  | Yes | No  |
| NONRATT021972             | N/A | Yes | No  | Yes |
| NR_033515 (Cyp2d37-ps)    | N/A | No  | Yes | No  |
| NR_045363 (2810429I04Rik) | N/A | No  | Yes | No  |
| PACER                     | N/A | No  | No  | Yes |
| PANDA                     | N/A | No  | No  | Yes |
| PCGEM1                    | N/A | No  | No  | Yes |
| Plnc1                     | N/A | No  | Yes | No  |
| Plscr4                    | 140 | Yes | Yes | Yes |
| PLUTO                     | N/A | No  | No  | Yes |
| PVT1                      | 2   | No  | Yes | Yes |
| PU.1 AS                   | N/A | No  | Yes | No  |
| RNCR3 (MIR124-1HG)        | 2   | No  | Yes | Yes |
| RP11-20G13.3 (LINC02244)  | N/A | No  | No  | Yes |
| RP11-290M5.4              | N/A | No  | No  | Yes |
| RP11-362F19.1             | N/A | No  | No  | Yes |
| RP11-363E7.4              | N/A | No  | No  | Yes |
| RP11-367F23.2             | N/A | No  | No  | Yes |
| RP11-392O17.1             | N/A | No  | No  | Yes |
| RP11-536K7.3              | N/A | No  | No  | Yes |
| RP11-559N14.5             | N/A | No  | No  | Yes |
| RP11-707P17               | N/A | No  | No  | Yes |
| RP11-79H23.3              | N/A | No  | No  | Yes |
| RP11-863P13.3             | N/A | No  | No  | Yes |
| RP11-99E15.2              | N/A | No  | No  | Yes |
| RP23 (OFD1)               | 393 | Yes | Yes | Yes |
| RP3-523K23.2              | N/A | No  | No  | Yes |
| RP5-833A20.1              | N/A | No  | No  | Yes |
| Rpph1                     | N/A | No  | No  | Yes |
| SALRNA1                   | N/A | No  | No  | Yes |
| SENCR                     | N/A | No  | No  | Yes |
| slicRAD                   | N/A | No  | Yes | No  |
| SMILR                     | N/A | No  | No  | Yes |
| SNHG1                     | N/A | No  | No  | Yes |
| SNHG7                     | N/A | No  | No  | Yes |

|                       |              |     |     |     |
|-----------------------|--------------|-----|-----|-----|
| <b>SRA</b>            | 289          | Yes | Yes | Yes |
| <b>TCONS_00075467</b> | N/A (Rabbit) | No  | No  | No  |
| <b>TCONS_00202959</b> | N/A          | Yes | No  | No  |
| <b>TGFB2-OT1</b>      | N/A          | No  | No  | Yes |
| <b>THRIL</b>          | N/A          | No  | No  | Yes |
| <b>TINCR</b>          | 3            | Yes | Yes | Yes |
| <b>Tmem189</b>        | 176          | No  | Yes | Yes |
| <b>TTY15</b>          | N/A          | No  | No  | Yes |
| <b>TUG1</b>           | 4            | Yes | Yes | Yes |
| <b>Uc.323</b>         | N/A          | No  | Yes | No  |
| <b>VLDLR-AS1</b>      | N/A          | No  | No  | Yes |
| <b>Wisper</b>         | N/A          | No  | Yes | Yes |
| <b>XIST</b>           | N/A          | No  | No  | Yes |
| <b>XR-007793</b>      | N/A          | Yes | No  | No  |
| <b>ZFAS1</b>          | N/A          | No  | No  | Yes |
